# Supplementary material
Source: PubMed Central journal article supplement (PMC6170198)
Supplement: NIHMS955271-supplement-supplement_1.pdf [file NIHMS955271-supplement-supplement_1.pdf]

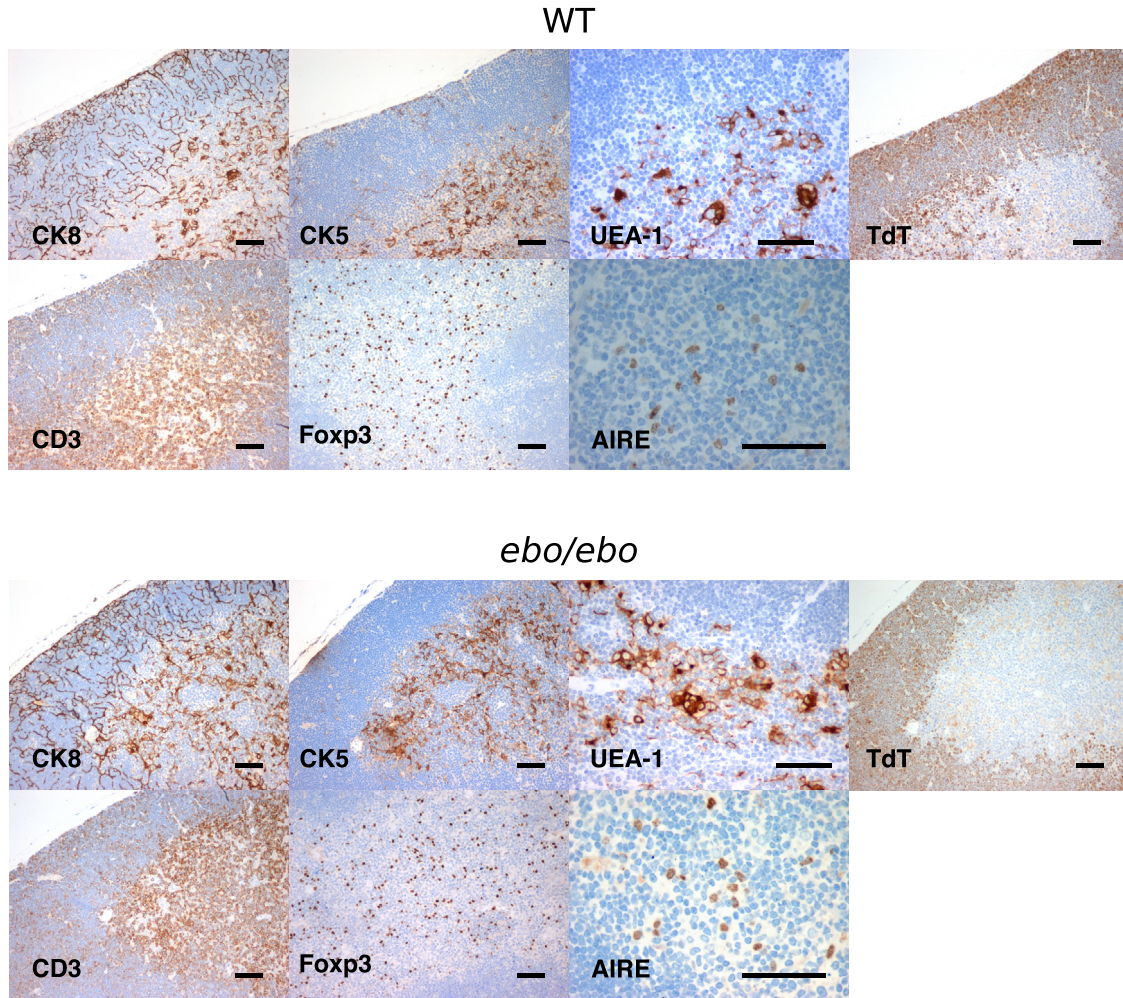

**FIG E1.** Normal thymic development and morphology in *ebo/ebo* mice. Immunohistochemistry of thymi from WT (*top panel*) and *ebo/ebo* (*bottom panel*) mice showing expression of cytokeratin 8<sup>+</sup> (*CK8*), cytokeratin 5<sup>+</sup> (*CK5*), *Ulex europaeus* agglutinin 1 (*UAE-1*), terminal deoxynucleotidyl transferase (*TdT*), CD3, forkhead box p3 (*Foxp3*), and the autoimmune regulator protein (*AIRE*). All images are shown at  $\times 20$  magnification with the exception of *UEA-1* ( $\times 40$  magnification) and *AIRE* ( $\times 60$  magnification). Bars = 50  $\mu\text{m}$ .
